# Supplementary material for: Dopaminergic modulation of performance monitoring in Parkinson’s disease: An event-related potential study
Source: PubMed Central journal article supplement (PMC5259704; doi:10.1038/srep41222), 2017-01-24
Supplement: srep41222-s1.pdf [file srep41222-s1.pdf]

# Dopaminergic modulation of performance monitoring in Parkinson's disease:

## An event-related potential study

Caroline Seer, Florian Lange, Sebastian Loens, Florian Wegner, Christoph Schrader, Dirk

Dressler, Reinhard Dengler, Bruno Kopp

### Supplementary Material

Table S1

*Means (M), standard deviations (SD), and range (min, max) of the numbers of trials included in the analysis of response-locked ERPs (N<sub>c</sub>/CRN, N<sub>c</sub>/ERN) in the two medication conditions for patients with Parkinson's disease (PD) and healthy controls (HC).*

|                     |     | HC (N = 13) |    |     |     | PD (N = 13) |    |     |     |
|---------------------|-----|-------------|----|-----|-----|-------------|----|-----|-----|
|                     |     | M           | SD | min | max | M           | SD | min | max |
| N <sub>c</sub> /CRN | off | 193         | 12 | 167 | 204 | 169         | 36 | 88  | 205 |
|                     | on  | 192         | 14 | 153 | 204 | 171         | 29 | 114 | 207 |
| N <sub>c</sub> /ERN | off | 22          | 12 | 9   | 46  | 46          | 37 | 10  | 127 |
|                     | on  | 22          | 13 | 12  | 59  | 43          | 27 | 9   | 96  |

*Note.* For PD patients, the conditions “off” and “on” indicate the actual medication state (i.e., whether the patients had taken their usual dose of medication [on] or were tested after withdrawal from dopaminergic medication [off]). The HC group was not administered with dopaminergic medication at any time, and the conditions “off” and “on” were merely used to assign control participants to one of two possible orders of medication conditions (see Methods for detailed explanation).

Table S2

*Means (M) and standard deviations (SD) of response-locked ERP amplitudes (in  $\mu\text{V}$ ) for patients with Parkinson's disease (PD) and healthy controls (HC).*

|                                            | HC (N = 13) |           | PD (N = 13) |           |
|--------------------------------------------|-------------|-----------|-------------|-----------|
|                                            | <i>M</i>    | <i>SD</i> | <i>M</i>    | <i>SD</i> |
| <b>off Session</b>                         |             |           |             |           |
| N <sub>e</sub> /CRN amplitude              | -2.06       | 2.25      | -1.10       | 1.88      |
| N <sub>e</sub> /ERN amplitude              | -5.01       | 2.92      | -3.26       | 1.82      |
| total amplitude                            | -3.54       | 2.15      | -2.18       | 1.27      |
| <b>on Session</b>                          |             |           |             |           |
| N <sub>e</sub> /CRN amplitude              | -2.55       | 1.32      | -0.92       | 1.76      |
| N <sub>e</sub> /ERN amplitude              | -5.19       | 3.05      | -2.33       | 1.61      |
| total amplitude                            | -3.87       | 2.02      | -1.62       | 1.20      |
| <b>averaged across off and on Sessions</b> |             |           |             |           |
| N <sub>e</sub> /CRN amplitude              | -2.31       | 1.69      | -1.01       | 1.76      |
| N <sub>e</sub> /ERN amplitude              | -5.10       | 2.85      | -2.79       | 1.61      |
| total amplitude                            | -3.70       | 2.04      | -1.90       | 1.16      |

*Note.* For PD patients, the conditions “off” and “on” indicate the actual medication state (i.e., whether the patients had taken their usual dose of medication [on] or were tested after withdrawal from dopaminergic medication [off]). The HC group was not administered with dopaminergic medication at any time, and the conditions “off” and “on” were merely used to assign control participants to one of two possible orders of medication conditions (see Methods for detailed explanation).

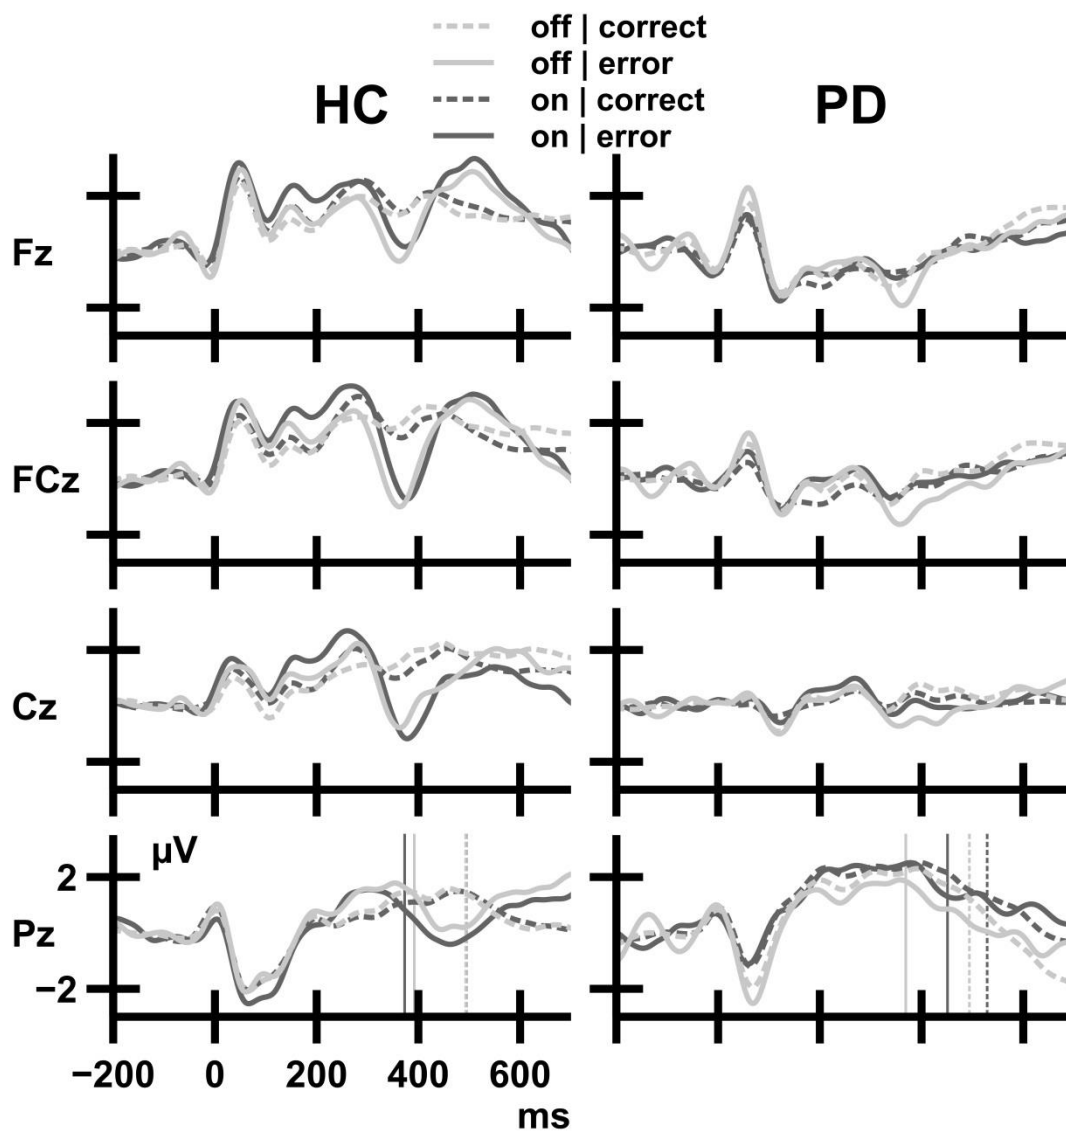

*Figure S1.* Grand average ERP waveforms at midline electrodes for healthy controls (HC, left panels) and patients with Parkinson’s disease (PD, right panels). ERPs are synchronized to incongruent stimuli, 0 ms indicates the time of target onset. Vertical lines in the bottom panels indicate the average reaction time (RT) per group and condition. Note that for HC, correct RTs for the two session conditions are virtually identical (off: 493 ms, on: 494 ms). For PD patients, the conditions “off” and “on” indicate the actual medication state (i.e., whether the patients had taken their usual dose of medication [on] or were tested after withdrawal from dopaminergic medication [off]). The HC group was not administered with dopaminergic medication at any time, and the conditions “off” and “on” were merely used to assign control participants to one of two possible orders of medication conditions (see Methods for detailed explanation).
